# Supplementary material
Source: Springer Nature journal article supplement (http://www.springermedizin.de/resource/supplementary/13014_2013_1176_MOESM2_ESM.pdf/9635040)

**A**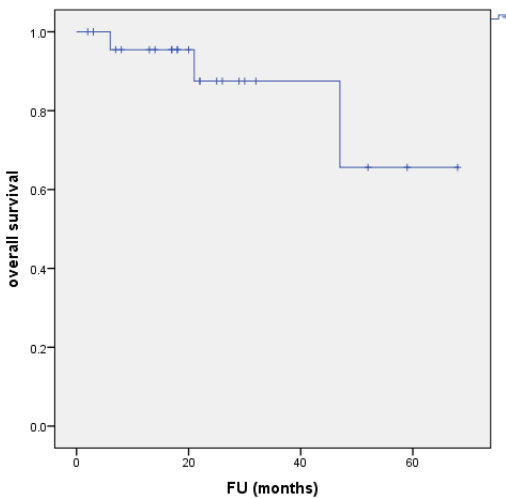**B**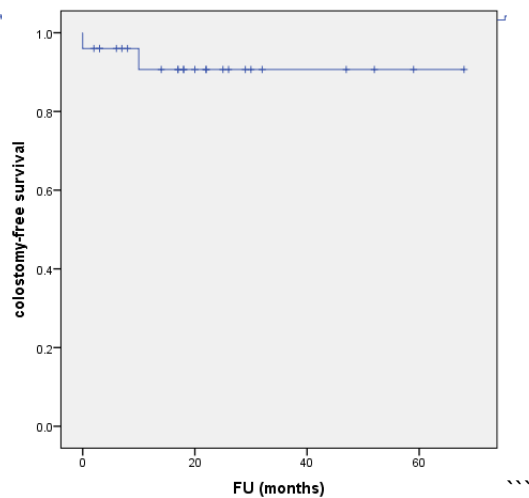**C**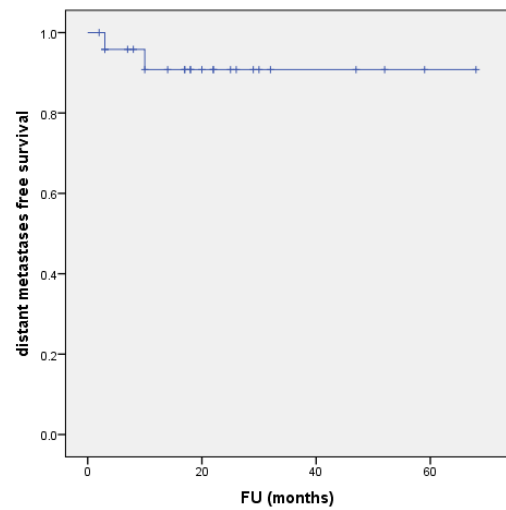**D**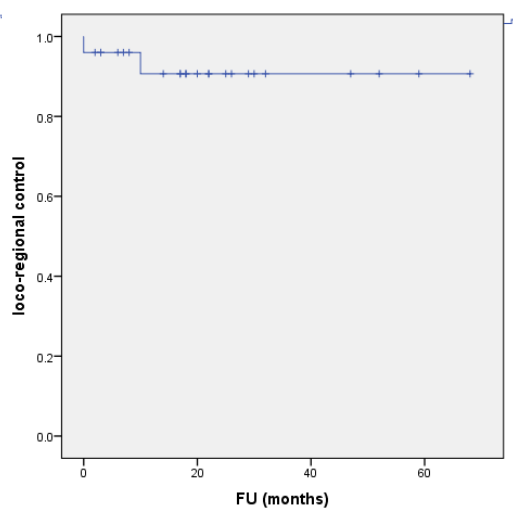

Supplement: MOESM2 [file 9635040]
